# Supplementary material for: The transcriptional and phenotypic characteristics that define alveolar macrophage subsets in acute hypoxemic respiratory failure
Source: PubMed Central journal article supplement (PMC10656558; doi:10.1038/s41467-023-43223-0), 2023-11-17
Supplement: 41467_2023_43223_MOESM3_ESM.pdf [file 41467_2023_43223_MOESM3_ESM.pdf]

## Description of Additional Supplementary Files

**Title:** Supplementary Data 1

**Description:** Sortable List of Normalized Expression for Cell-Surface Proteins per Transcriptional Cluster
