# Supplementary material for: The transcriptional and phenotypic characteristics that define alveolar macrophage subsets in acute hypoxemic respiratory failure
Source: PubMed Central journal article supplement (PMC10656558; doi:10.1038/s41467-023-43223-0), 2023-11-17
Supplement: 41467_2023_43223_MOESM5_ESM.pdf [file 41467_2023_43223_MOESM5_ESM.pdf]

## Reporting Summary

Nature Portfolio wishes to improve the reproducibility of the work that we publish. This form provides structure for consistency and transparency in reporting. For further information on Nature Portfolio policies, see our [Editorial Policies](#) and the [Editorial Policy Checklist](#).

### Statistics

For all statistical analyses, confirm that the following items are present in the figure legend, table legend, main text, or Methods section.

n/a Confirmed

- The exact sample size ( $n$ ) for each experimental group/condition, given as a discrete number and unit of measurement
- A statement on whether measurements were taken from distinct samples or whether the same sample was measured repeatedly
- The statistical test(s) used AND whether they are one- or two-sided  
*Only common tests should be described solely by name; describe more complex techniques in the Methods section.*
- A description of all covariates tested
- A description of any assumptions or corrections, such as tests of normality and adjustment for multiple comparisons
- A full description of the statistical parameters including central tendency (e.g. means) or other basic estimates (e.g. regression coefficient) AND variation (e.g. standard deviation) or associated estimates of uncertainty (e.g. confidence intervals)
- For null hypothesis testing, the test statistic (e.g.  $F$ ,  $t$ ,  $r$ ) with confidence intervals, effect sizes, degrees of freedom and  $P$  value noted  
*Give  $P$  values as exact values whenever suitable.*
- For Bayesian analysis, information on the choice of priors and Markov chain Monte Carlo settings
- For hierarchical and complex designs, identification of the appropriate level for tests and full reporting of outcomes
- Estimates of effect sizes (e.g. Cohen's  $d$ , Pearson's  $r$ ), indicating how they were calculated

*Our web collection on [statistics for biologists](#) contains articles on many of the points above.*

### Software and code

Policy information about [availability of computer code](#)

|                 |                                                                                                                                                                                                                                                                                                                                                                                                                                                                                                                                                                                                                                                                                                                                                                                                                                                                                                                                                                                                                                                                                                                                                                                                                                                                                                                                                                                                                                                                                                                                                                                                                                                                                                                                                                                                                                                                                                                                                                                                                                                                                                                                                                                                                                                                                                                                                                                         |
|-----------------|-----------------------------------------------------------------------------------------------------------------------------------------------------------------------------------------------------------------------------------------------------------------------------------------------------------------------------------------------------------------------------------------------------------------------------------------------------------------------------------------------------------------------------------------------------------------------------------------------------------------------------------------------------------------------------------------------------------------------------------------------------------------------------------------------------------------------------------------------------------------------------------------------------------------------------------------------------------------------------------------------------------------------------------------------------------------------------------------------------------------------------------------------------------------------------------------------------------------------------------------------------------------------------------------------------------------------------------------------------------------------------------------------------------------------------------------------------------------------------------------------------------------------------------------------------------------------------------------------------------------------------------------------------------------------------------------------------------------------------------------------------------------------------------------------------------------------------------------------------------------------------------------------------------------------------------------------------------------------------------------------------------------------------------------------------------------------------------------------------------------------------------------------------------------------------------------------------------------------------------------------------------------------------------------------------------------------------------------------------------------------------------------|
| Data collection | We abstracted clinical data from the electronic medical record into standardized case report forms housed in a REDCap database.                                                                                                                                                                                                                                                                                                                                                                                                                                                                                                                                                                                                                                                                                                                                                                                                                                                                                                                                                                                                                                                                                                                                                                                                                                                                                                                                                                                                                                                                                                                                                                                                                                                                                                                                                                                                                                                                                                                                                                                                                                                                                                                                                                                                                                                         |
| Data analysis   | <p>We used Cell-Ranger mkfastq (10x Genomics) to demultiplex and produce raw fastq files for downstream analyses. We used Cell-Ranger multi to align per-sample reads of gene expression to the GRCh38 human reference genome, as well as feature barcoded TotalSeq antibodies to their reference sequences. We combined per-sample-count matrices into a filtered aggregated matrix using Cell-Ranger aggr. We excluded cells with &lt; 500 genes, &gt; 4,500 features, &gt;12.5% reads mapping to the mitochondrial genome, &gt; 15% genes mapping to ribosomal genes, and &gt;5% genes aligning to heme-associated genes.</p> <p>We used query-reference mapping in Seurat to annotate cells based on their similarity to expression in the provided peripheral blood monocyte dataset. We filtered our Seurat object to only include monocytes, macrophages, and classic dendritic cells as defined by this reference. To account for batch effects, we normalized each sample (method = Center Log Fold Ratio) and filtered based on the above quality control metrics independently before integrating samples via Seurat's FindIntegrationAnchors function (number of variable anchors = 2000).</p> <p>We performed PCA analysis in Seurat using both surface antibodies and gene expression data (30 PCs from gene expression and 15 PCs from surface antibodies), followed by dimensional reduction (UMAP, dims: 1:30). We calculated nearest neighbors and performed Louvain clustering in Seurat (resolution = 0.3). We identified both top gene and antibody markers for each of our clusters using FindMarkers (Wilcox-T test, <math>\log_2\text{fc} &gt; 0.25</math>, <math>p &lt; 0.05</math> for gene expression, <math>p &lt; 0.05</math> and <math>\log_2\text{fc} &gt; 0.1</math> for antibodies). In a sensitivity analysis, we performed noise reduction of the antibody markers by utilizing three different mouse isotype negative controls to account for background technical noise generated from factors such as ambient, unbound antibody encapsulated in the droplets. We projected the cell-surface protein "antigen specificity score," which is the likelihood of an antigen binding to a specific receptor compared to the negative control ((1-beta.cdf(0.925, Antigen UMI + 1, Control UMI + 3)) * 100), onto the alveolar myeloid cluster UMAP.</p> |

For our integrated blood-lung analysis, we used integration anchors in Seurat to perform query-reference mapping between our BAL dataset and paired PBMC samples. This allowed PBMC samples to be visualized on the previously produced UMAP projection of BAL cells. We annotated our PBMC samples based on cluster identities derived from our BAL dataset (Multimodal Reference Mapping), as well as calculated additional PCs ( $n = 30$ ) and UMAP (dims: 1:30) to describe variation in the combined PBMC and BAL dataset. We used ggplot2 to visualize our analyses. We used T-tests or Mann-Whitney tests based on whether the data had a parametric or non-parametric distribution for univariate comparisons of expression levels or percent populations. Sample size for power analysis was not predetermined for our study.

We derived average gene expression values for B1 and B2 alveolar myeloid cells via the AverageExpression Function in Seurat, creating pseudo-bulked samples for further differential expression analysis. We then identified differentially expressed genes between B1 and B2 timepoints ( $\log_2\text{fc} > 0.25$ ,  $p\text{-value} < 0.05$ ). In order to compare our data with previously published data from healthy participants, we batch corrected and integrated both datasets via shared variable genes using FindIntegrationAnchors ( $n$  anchors = 2000). We averaged the scaled expression of each gene across our samples and our clusters using the pseudo-bulk approach described above.

We performed RNA velocity and trajectory analyses on the BAL samples by extracting the metadata from our filtered Seurat object and used it to construct an anndata object for processing in python using Scampy, NumPy, and pandas. Loom files containing spliced and unspliced reads on a per sample basis were constructed using velocity, and integrated with our pre-existing metadata with the merge utility accompanying the package scVelo. We used scVelo to calculate velocity scores for each cell in our dataset, and visualized our previously constructed projections with the included velocity vectors. We generated a PAGA velocity graph using the RNA velocity data. All statistical analyses were performed in R version 4.2.1 and in Python2.

For manuscripts utilizing custom algorithms or software that are central to the research but not yet described in published literature, software must be made available to editors and reviewers. We strongly encourage code deposition in a community repository (e.g. GitHub). See the Nature Portfolio [guidelines for submitting code & software](#) for further information.

## Data

Policy information about [availability of data](#)

All manuscripts must include a [data availability statement](#). This statement should provide the following information, where applicable:

- Accession codes, unique identifiers, or web links for publicly available datasets
- A description of any restrictions on data availability
- For clinical datasets or third party data, please ensure that the statement adheres to our [policy](#)

We have deposited our CITE-seq data into the GEO database (accession number: GSE234918). We have deposited our code in GitHub ( [https://github.com/BenaroyaResearch/Alveolar\\_Macrophage\\_Subsets\\_ARDS](https://github.com/BenaroyaResearch/Alveolar_Macrophage_Subsets_ARDS)).

## Research involving human participants, their data, or biological material

Policy information about studies with [human participants or human data](#). See also policy information about [sex, gender \(identity/presentation\), and sexual orientation](#) and [race, ethnicity and racism](#).

|                                                                    |                                                                                                                                                                                                                                                                                                                                                                                                                                                             |
|--------------------------------------------------------------------|-------------------------------------------------------------------------------------------------------------------------------------------------------------------------------------------------------------------------------------------------------------------------------------------------------------------------------------------------------------------------------------------------------------------------------------------------------------|
| Reporting on sex and gender                                        | Reporting on sex and gender is described in Table 1. We did not stratify our analyses by sex or gender due to the sample size.                                                                                                                                                                                                                                                                                                                              |
| Reporting on race, ethnicity, or other socially relevant groupings | Reporting on race and ethnicity is described in Table 1. We did not stratify our analyses by race or ethnicity due to the sample size.                                                                                                                                                                                                                                                                                                                      |
| Population characteristics                                         | Population characteristics are reported in Table 1 and Table 2.                                                                                                                                                                                                                                                                                                                                                                                             |
| Recruitment                                                        | Research coordinators at Harborview Medical Center screened the electronic medical record for potential participants who met our study's inclusion and exclusion criteria (Table S1). The legal next of kin of potential participants who met study inclusion/exclusion criteria were approached by research coordinators to obtain informed consent to participate in the study. If legal next of kin consented for the study, participants were enrolled. |
| Ethics oversight                                                   | The University of Washington Human Subjects Division provided ethics oversight for this study.                                                                                                                                                                                                                                                                                                                                                              |

Note that full information on the approval of the study protocol must also be provided in the manuscript.

## Field-specific reporting

Please select the one below that is the best fit for your research. If you are not sure, read the appropriate sections before making your selection.

- Life sciences     Behavioural & social sciences     Ecological, evolutionary & environmental sciences

For a reference copy of the document with all sections, see [nature.com/documents/nr-reporting-summary-flat.pdf](https://www.nature.com/documents/nr-reporting-summary-flat.pdf)

## Life sciences study design

All studies must disclose on these points even when the disclosure is negative.

Sample size    Sample size for power analysis was not predetermined for our study.

|                 |                                                                                                                                                                                                                                                                                                                                                                                                                                                                                                                        |
|-----------------|------------------------------------------------------------------------------------------------------------------------------------------------------------------------------------------------------------------------------------------------------------------------------------------------------------------------------------------------------------------------------------------------------------------------------------------------------------------------------------------------------------------------|
| Data exclusions | None                                                                                                                                                                                                                                                                                                                                                                                                                                                                                                                   |
| Replication     | We were able to validate CD14, CD71, and CD163 in our HMC Clinical Cohort using flow cytometry because that cell-surface antibody panel contained these antibody markers. We were not able to validate the other cell-surface proteins that our CITE-seq data identified because the flow cytometry data was generated prior to the CITE-seq experiments.                                                                                                                                                              |
| Randomization   | This is a cohort study testing whether alveolar leukocyte subsets are associated with clinical outcomes and other biologic measures. Therefore, randomization into intervention groups is not applicable.                                                                                                                                                                                                                                                                                                              |
| Blinding        | Research scientists who performed the CITE-seq and flow cytometry experiments were blinded to clinical data. The computation core responsible for the sequencing and alignment pipeline did not have access to any clinical information. The computational biologist who performed all computation analyses, including clustering and subset identification, did not have access to any clinical information. The clinicians who generated the clinical datasets did not have access to any of the raw molecular data. |

## Reporting for specific materials, systems and methods

We require information from authors about some types of materials, experimental systems and methods used in many studies. Here, indicate whether each material, system or method listed is relevant to your study. If you are not sure if a list item applies to your research, read the appropriate section before selecting a response.

### Materials & experimental systems

| n/a                                 | Involvement in the study                               |
|-------------------------------------|--------------------------------------------------------|
| <input type="checkbox"/>            | <input checked="" type="checkbox"/> Antibodies         |
| <input checked="" type="checkbox"/> | <input type="checkbox"/> Eukaryotic cell lines         |
| <input checked="" type="checkbox"/> | <input type="checkbox"/> Palaeontology and archaeology |
| <input checked="" type="checkbox"/> | <input type="checkbox"/> Animals and other organisms   |
| <input type="checkbox"/>            | <input checked="" type="checkbox"/> Clinical data      |
| <input checked="" type="checkbox"/> | <input type="checkbox"/> Dual use research of concern  |
| <input checked="" type="checkbox"/> | <input type="checkbox"/> Plants                        |

### Methods

| n/a                                 | Involvement in the study                           |
|-------------------------------------|----------------------------------------------------|
| <input checked="" type="checkbox"/> | <input type="checkbox"/> ChIP-seq                  |
| <input type="checkbox"/>            | <input checked="" type="checkbox"/> Flow cytometry |
| <input checked="" type="checkbox"/> | <input type="checkbox"/> MRI-based neuroimaging    |

## Antibodies

### Antibodies used

Please refer to Table S3 for full details:

CD86 anti-human CD86 IT2.2 GTCTTTGTCAGTGCA  
 CD274 anti-human CD274 (B7-H1, PD-L1) 29E.2A3 GTTGCCGACAATAC  
 TNFRSF14 anti-human CD270 (HVEM, TR2) 122 TGATAGAAACAGACC  
 PVR anti-human CD155 (PVR) SKII.4 ATCACATCGTTGCCA  
 NECTIN2 anti-human CD112 (Nectin-2) TX31 AACCTCCGCTAAG  
 CD47 anti-human CD47 CC2C6 GCATTCTGTACCTA  
 CD48 anti-human CD48 BJ40 CTACGACGTAGAAGA  
 CD40 anti-human CD40 5C3 CTCAGATGGAGTATG  
 CD40LG anti-human CD154 24-31 GCTAGATAGATGCAA  
 CD52 anti-human CD52 HI186 CTTTGTACGAGCAAA  
 CD3D anti-human CD3 UCHT1 CTCATTGTAACCTCT  
 CD8A anti-human CD8 SK1 GCGCAACTTGATGAT  
 NCAM1 anti-human CD56 5.1H11 TCCTTCCTGATAGG  
 CD19 anti-human CD19 HIB19 CTGGGCAATTACTCG  
 CD33 anti-human CD33 P67.6 TAACTCAGGGCCTAT  
 ITGAX anti-human CD11c S-HCL-3 TACGCCTATAACTTG  
 HLA-A anti-human HLA-A,B,C W6/32 TATGCGAGGCTTATC  
 PTPRC anti-human CD45RA HI100 TCAATCCTTCGCTT  
 IL3RA anti-human CD123 6H6 CTCACTCTGTACAGG  
 CD7 anti-human CD7 CD7-6B7 TGGATTCCCGACTT  
 ENG anti-human CD105 43A3 ATCGTCGAGAGCTAG  
 ITGA6 anti-human/mouse CD49f GoH3 TTCCGAGGATGATCT  
 CCR4 anti-human CD194 (CCR4) L291H4 AGCTTACCTGCACGA  
 CD4 anti-human CD4 RPA-T4 TGTTCCCGCTCAACT  
 CD44 anti-mouse/human CD44 IM7 TGGCTTCAGGTCCTA  
 CD14 anti-human CD14 M5E2 TCTCAGACCTCCGTA  
 FCGR3A anti-human CD16 3G8 AAGTCACTCTTTGC  
 IL2RA anti-human CD25 BC96 TTTGTCTGTACGCC  
 PTPRC anti-human CD45RO UCHL1 CTCCGAATCATGTTG  
 PDCD1 anti-human CD279 (PD-1) EH12.2H7 ACAGCGCCGTATTTA

TIGIT anti-human TIGIT (VSTM3) A15153G TTGCTTACGCCAGA  
 isotype Mouse IgG1,  $\kappa$  isotype Ctrl MOPC-21 GCCGGACGACATTA  
 isotype Mouse IgG2a,  $\kappa$  isotype Ctrl MOPC-173 CTCCTACCTAAACTG  
 isotype Mouse IgG2b,  $\kappa$  isotype Ctrl MPC-11 ATATGTATCAGCGA  
 isotype Rat IgG2b,  $\kappa$  Isotype Ctrl RTK4530 GATTCTTGACGACCT  
 MS4A1 anti-human CD20 2H7 TTCTGGGTCCCTAGA  
 NCR1 anti-human CD335 (NKp46) 9E2 ACAATTTGAACAGCG  
 PECAM1 anti-human CD31 WM59 ACCTTTATGCCACGG  
 MCAM anti-human CD146 P1H12 CCTTGGATAACATCA  
 IGHM anti-human IgM MHM-88 TAGCGAGCCCGTATA  
 CD5 anti-human CD5 UCHT2 CATTAAACGGGATGCC  
 CXCR3 anti-human CD183 (CXCR3) G025H7 GCGATGGTAGATTAT  
 CCR5 anti-human CD195 (CCR5) J418F1 CCAAAGTAAGAGCCA  
 FCGR2A anti-human CD32 FUN-2 GCTTCCGAATTACCG  
 CCR6 anti-human CD196 (CCR6) G034E3 GATCCCTTTGTCACT  
 CXCR5 anti-human CD185 (CXCR5) J252D4 AATTCAACCGTCGCG  
 ITGAE anti-human CD103 (Integrin  $\alpha$ E) Ber-ACT8 GACCTCATTGTGAAT  
 CD69 anti-human CD69 FN50 GTCTCTTGGCTTAAA  
 SELL anti-human CD62L DREG-56 GTCCTGCAACTTGA  
 KLRB1 anti-human CD161 HP-3G10 GTACGCAGTCCTTCT  
 CTLA4 anti-human CD152 (CTLA-4) BNI3 ATGGTTCACGTAATC  
 LAG3 anti-human CD223 (LAG-3) 11C3C65 CATTGTCTGCCGGT  
 KLRG1 anti-human KLRG1 (MAFA) SA231A2 CTTATTTCTGCCCT  
 CD27 anti-human CD27 O323 GCACTCCTGCATGTA  
 LAMP1 anti-human CD107a (LAMP-1) H4A3 CAGCCCACTGCAATA  
 FAS anti-human CD95 (Fas) DX2 CCAGCTCATTAGAGC  
 TNFRSF4 anti-human CD134 (OX40) Ber-ACT35 (ACT35) AACCCACCGTTGTGA  
 HLA-DRA anti-human HLA-DR L243 AATAGCGAGCAAGTA  
 CD1C anti-human CD1c L161 GAGCTACTTCACTCG  
 ITGAM anti-human CD11b ICRF44 GACAAGTGATCTGCA  
 FCGR1A anti-human CD64 10.1 AAGTATGCCCTACGA  
 THBD anti-human CD141 (Thrombomodulin) M80 GGATAACCGCGCTTT  
 CD1D anti-human CD1d 51.1 TCGAGTCGCTTATCA  
 KLRK1 anti-human CD314 (NKG2D) 1D11 CGTGTTTGTCTCTCA  
 CR1 anti-human CD35 E11 ACTTCCGTCGATCTT  
 B3GAT1 anti-human CD57 Recombinant QA17A04 AACTCCCTATGGAGG  
 BTLA anti-human CD272 (BTLA) MIH26 GTTATTGGACTAAGG  
 ICOS anti-human/mouse/rat CD278 (ICOS) C398.4A CGCGCACCCATTA  
 CD58 anti-human CD58 (LFA-3) TS2/9 GTTCTATGGACGAC  
 ENTPD1 anti-human CD39 A1 TTACCTGGTATCCGT  
 CX3CR1 anti-human CX3CR1 K0124E1 AGTATCGTCTCTGGG  
 CD24 anti-human CD24 ML5 AGATTCTTCTGTGTT  
 CR2 anti-human CD21 Bu32 AACCTAGTAGTTCGG  
 ITGAL anti-human CD11a TS2/4 TATATCCTTGTGAGC  
 CD79B anti-human CD79b (Ig $\beta$ ) CB3-1 ATTCTTCAACCGAAG  
 CD244 anti-human CD244 (2B4) C1.7 TCGCTTGGATGGTAG  
 SIGLEC1 anti-human CD169 (Sialoadhesin, Siglec-1) 7-239 TACTCAGCGTGTGG  
 ITGB7 anti-human/mouse integrin  $\beta$ 7 FIB504 TCCTTGGATGTACCG  
 TNFRSF13C anti-human CD268 (BAFF-R) 11C1 CGAAGTCGATCCGTA  
 GP1BB anti-human CD42b HIP1 TCCTAGTACCGAAGT  
 ICAM1 anti-human CD54 HA58 CTGATAGACTTGAGT  
 SELP anti-human CD62P (P-Selectin) AK4 CCTTCCGTATCCCTT  
 IFNGR1 anti-human CD119 (IFN- $\gamma$  R  $\alpha$  chain) GIR-208 TGTGTATTCCTTGT  
 isotype Rat IgG1,  $\kappa$  isotype Ctrl RTK2071 ATCAGATGCCCTCAT  
 Isotype Rat IgG2a,  $\kappa$  Isotype Ctrl RTK2758 AAGTCAGGTTCTGTTT  
 isotype Armenian Hamster IgG Isotype Ctrl HTK888 CCTGTCTTAAGACT  
 IL2RB anti-human CD122 (IL-2R $\beta$ ) TU27 TCATTTCCCTCCGATT  
 TNFRSF13B anti-human CD267 (TACI) 1A1 AGTGATGGAGCGAAC  
 FCER1A anti-human Fc $\epsilon$ R1 $\alpha$  AER-37 (CRA-1) CTCGTTTCCGTATCG  
 ITGA2B anti-human CD41 HIP8 ACGTTGTGGCCTTGT  
 TNFRSF9 anti-human CD137 (4-1BB) 4B4-1 CAGTAAGTTCGGGAC  
 CD163 anti-human CD163 GHI/61 GCTTCTCTTCTTA  
 CD83 anti-human CD83 HB15e CCACTCATTCCGGT  
 IL4R anti-human CD124 (IL-4R $\alpha$ ) G077F6 CCGTCCTGATAGATG  
 ANPEP anti-human CD13 WM15 TTTCAACGCCCTTTC  
 CD2 anti-human CD2 TS1/8 TACGATTTGTCAGGG  
 CD226 anti-human CD226 (DNAM-1) 11A8 TCTCAGTGTGTGG  
 ITGB1 anti-human CD29 TS2/16 GTATTCCTCAGTCA

CLEC4C anti-human CD303 (BDCA-2) 201A GAGATGTCCGAATTT  
 ITGA2 anti-human CD49b P1E6-C5 GCTTTCTTCAGTATG  
 CD81 anti-human CD81 (TAPA-1) 5A6 GTATCCTTCCTTGCC  
 IGHG anti-human IgD IA6-2 CAGTCTCCGTAGAGT  
 ITGB2 anti-human CD18 TS1/18 TATTGGGACACTTCT  
 CD28 anti-human CD28 CD28.2 TGAGAACGACCCCTAA  
 CD38 anti-human CD38 HIT2 TGTACCCGCTTGTA  
 IL7R anti-human CD127 (IL-7R $\alpha$ ) A019D5 GTGTGTTGTCCTATG  
 PTPRC anti-human CD45 HI30 TGCAATTACCCGGAT  
 CD22 anti-human CD22 S-HCL-1 GGGTTGTTGCTTTG  
 TFRC anti-human CD71 CY1G4 CCGTGTTCCTCATA  
 DPP4 anti-human CD26 BA5b GGTGGCTAGATAATG  
 CD36 anti-human CD36 5-271 TTCTTTGCCTTGCCA  
 KIR2DL1 anti-human CD158 (KIR2DL1/S1/S3/S5) HP-MA4 TATCAACCAACGCTT  
 ITGA1 anti-human CD49a TS2/7 ACTGATGGACTCAGA  
 ITGA4 anti-human CD49d 9F10 CCATTCACACTCCGG  
 NT5E anti-human CD73 (Ecto-5'-nucleotidase) AD2 CAGTTCCTCAGTTCC  
 OLR1 anti-human LOX-1 15C4 ACCCTTTACCGAATA  
 KIR2DL3 anti-human CD158b (KIR2DL2/L3, NKAT2) DX27 GACCCGTAGTTTGAT  
 KIR3DL1 anti-human CD158e1 (KIR3DL1, NKB1) DX9 GGACGCTTTCCTTGA  
 SLAMF7 anti-human CD319 (CRACC) 162.1 AGTATGCCATGTCTT  
 CD99 anti-human CD99 3B2/TA8 ACCCGTCCCTAAGAA  
 CLEC12A anti-human CLEC12A 50C1 CATTAGAGTCTGCCA  
 SLAMF6 anti-human CD352 (NTB-A) NT-7 AGTTCCACTCAGGC  
 KLRD1 anti-human CD94 DX22 CTTCCGGTCTTACA  
 IGKC anti-human Ig light chain  $\kappa$  MHK-49 AGCTCAGCCAGTATG  
 LILRB1 anti-human CD85j (ILT2) GHI/75 CCTTGTGAGGCTATG  
 FCER2 anti-human CD23 EBVCS-5 TCTGTATAACCGTCT  
 SIGLEC7 anti-human CD328 (Siglec-7) 6-434 CTTAGCATTTCACTG  
 ADGRG1 anti-human GPR56 CG4 GCCTAGTTTCCGTTT  
 HLA-E anti-human HLA-E 3D12 GAGTCGAGAAATCAT  
 CD82 anti-human CD82 ASL-24 TCCCCTCCGCTTT  
 CD101 anti-human CD101 (BB27) BB27 CTACTTCCCTGTCAA  
 C5AR1 anti-human CD88 (C5aR) S5/1 GCCGCATGAGAAACA  
 GGT1 anti-human CD224 KF29 CTGATGAGATGTGAG  
 CD206 anti-human CD206 15-2 TCAGAACGTCTAACT  
 CD298 anti-human CD298 (PD1) EH12.2H7 ACAGCGCCGTATTTA  
 CCR2 Anti-human CCR2 K036C2 GAGTCCCTTACCTG  
 Hashtag 9 Hashtag 9 LNH-94;2M2 CAGTAGTCACGGTCA  
 Hashtag 13 Hashtag 13 LNH-94; 2M2 AAATCTCTCAGGCTC

Please refer to Table S11 for full details:

CD45 2D1 Alexa Fluor 700  
 CD3 UCHT1 Brilliant Violet 570  
 CD11b ICRF44 APC  
 CD14 M5E2 APC/Cyanine7  
 CD15 HI98 Brilliant Ultra Violet 395  
 CD71 CY1G4 Brilliant Violet 650  
 CD163 GHI/61 Brilliant Violet 605  
 CD172a 15-414 FITC  
 CD192 K036C2 PE/Dazzle 594  
 CD169 7-239 Brilliant Violet 421  
 CD206 15-2 Brilliant Violet 785  
 CD274 29E.2A3 Brilliant Violet 711  
 CD282 TL2.1 PE  
 CD326 9C4 PE/Cyanine7

#### Validation

All antibodies we used for this study are commercially available and validated by the companies we purchase them from (e.g. BioLegend, BD Biosciences). We purchased all antibodies directly from established vendors and stored the products as recommended.

## Clinical data

Policy information about [clinical studies](#)

All manuscripts should comply with the ICMJE [guidelines for publication of clinical research](#) and a completed [CONSORT checklist](#) must be included with all submissions.

|                             |                                                                                                                                                                         |
|-----------------------------|-------------------------------------------------------------------------------------------------------------------------------------------------------------------------|
| Clinical trial registration | <input type="text" value="This cohort study was not registered with ClinicalTrials.gov."/>                                                                              |
| Study protocol              | <input type="text" value="The study protocol was described in detail in the Methods section of the manuscript. The full study protocol can be provided upon request."/> |
| Data collection             | <input type="text" value="This information is provided in the Methods section of the manuscript."/>                                                                     |
| Outcomes                    | <input type="text" value="This information is provided in the Methods section of the manuscript."/>                                                                     |

## Flow Cytometry

### Plots

Confirm that:

- The axis labels state the marker and fluorochrome used (e.g. CD4-FITC).
- The axis scales are clearly visible. Include numbers along axes only for bottom left plot of group (a 'group' is an analysis of identical markers).
- All plots are contour plots with outliers or pseudocolor plots.
- A numerical value for number of cells or percentage (with statistics) is provided.

### Methodology

|                           |                                                                                                                  |
|---------------------------|------------------------------------------------------------------------------------------------------------------|
| Sample preparation        | <input type="text" value="This information is provided in the Methods section of the manuscript."/>              |
| Instrument                | <input type="text" value="This information is provided in the Methods section of the manuscript."/>              |
| Software                  | <input type="text" value="This information is provided in the Methods section of the manuscript."/>              |
| Cell population abundance | <input type="text" value="This information is provided in the Methods section of the manuscript."/>              |
| Gating strategy           | <input type="text" value="This information is provided in the Methods section and Figure 5 of the manuscript."/> |

- Tick this box to confirm that a figure exemplifying the gating strategy is provided in the Supplementary Information.
